# Supplementary material for: Effect of intercropping Lolium perenne in Ziziphus jujuba orchards on soil quality in the canopy
Source: PeerJ. 2025 Feb 7;13:e18710. doi: 10.7717/peerj.18710 (PMC11809302; doi:10.7717/peerj.18710)
Supplement: Supplemental Information 1 [file peerj-13-18710-s001.xlsx]

## Sheet: Sheet1
2023		(＞5mm)						(5-2mm)						(2-1mm)						(1-0.5mm)						(0.5-0.25mm)						0.25						D						MWD
M1	0-5cm	0.01	0.03	0.03	0.0233333	0.011547	0.02±0.01	0.59	0.57	0.57	0.576667	0.011547	0.58±0.01	0.66	0.63	0.64	0.643333	0.0152753	0.64±0.02	0.75	0.73	0.74	0.74	0.01	0.74±0.01	5.28	5.46	5.31	5.35	0.0964365	5.35±0.1	44.24	43.78	44.87	44.2967	0.547205	44.3±0.55	2.96673	2.96609	2.96727	2.9667	0.000592034	2.97±0	0.22405	0.22465	0.2267	0.225133	0.00138954	0.23±0
	5-10cm	0.35	0.37	0.35	0.356667	0.011547	0.36±0.01	0.75	0.78	0.77	0.766667	0.0152753	0.77±0.02	0.52	0.55	0.53	0.533333	0.0152753	0.53±0.02	0.41	0.43	0.42	0.42	0.01	0.42±0.01	4.6	4.77	4.65	4.67333	0.0873689	4.67±0.09	43.9	43.66	45.7	44.42	1.11499	44.42±1.11	2.96971	2.96838	2.97041	2.9695	0.00103355	2.97±0	0.271	0.277975	0.277725	0.275567	0.00395682	0.28±0
	10-20cm	0.03	0.01	0.01	0.0166667	0.011547	0.02±0.01	0.51	0.49	0.5	0.5	0.01	0.5±0.01	0.59	0.61	0.6	0.6	0.01	0.6±0.01	0.7	0.68	0.69	0.69	0.01	0.69±0.01	6.18	6.39	6.31	6.29333	0.105987	6.29±0.11	41.75	43.33	43.27	42.7833	0.895396	42.78±0.9	2.96262	2.96327	2.96347	2.96312	0.000440404	2.96±0	0.212625	0.22055	0.22035	0.217842	0.00451887	0.22±0
	20-40cm	0.13	0.12	0.11	0.12	0.01	0.12±0.01	1	1.05	1.01	1.02	0.0264575	1.02±0.03	0.86	0.9	0.88	0.88	0.02	0.88±0.02	0.61	0.64	0.62	0.623333	0.0152753	0.62±0.02	3.36	3.51	3.42	3.43	0.0754983	3.43±0.08	45.43	44.92	46.09	45.48	0.5866	45.48±0.59	2.97134	2.96983	2.97135	2.97084	0.000873608	2.97±0	0.19465	0.22055	0.263775	0.226325	0.0349225	0.23±0.03
M2	0-5cm	1.45	1.5	1.45	1.46667	0.0288675	1.47±0.03	1.01	1.06	1.04	1.03667	0.0251661	1.04±0.03	0.78	0.81	0.8	0.796667	0.0152753	0.8±0.02	0.84	0.86	0.85	0.85	0.01	0.85±0.01	6.53	6.79	6.64	6.65333	0.130512	6.65±0.13	41.23	40.82	40.6	40.8833	0.319739	40.88±0.32	2.95115	2.94903	2.94973	2.94997	0.00107881	2.95±0	0.517625	0.266725	0.47835	0.4209	0.134956	0.42±0.13
	5-10cm	0.04	0.02	0	0.02	0.02	0.02±0.02	0.82	0.84	0.84	0.833333	0.011547	0.83±0.01	0.8	0.83	0.82	0.816667	0.0152753	0.82±0.02	0.69	0.67	0.68	0.68	0.01	0.68±0.01	6.02	6.27	6.11	6.13333	0.126623	6.13±0.13	43.2	42	44.46	43.22	1.23012	43.22±1.23	2.96137	2.95933	2.96201	2.96091	0.00140072	2.96±0	0.25855	0.489375	0.250575	0.332833	0.135628	0.33±0.14
	10-20cm	1.37	1.41	1.37	1.38333	0.023094	1.38±0.02	1.52	1.56	1.54	1.54	0.02	1.54±0.02	0.71	0.73	0.72	0.72	0.01	0.72±0.01	0.63	0.65	0.64	0.64	0.01	0.64±0.01	3.75	3.9	3.82	3.82333	0.0750555	3.82±0.08	41.9	43.85	44.15	43.3	1.22168	43.3±1.22	2.96097	2.96144	2.96232	2.96158	0.000686185	2.96±0	0.38275	0.248775	0.483525	0.371683	0.117766	0.37±0.12
	20-40cm	0.01	0.03	0.01	0.0166667	0.011547	0.02±0.01	0.53	0.55	0.53	0.536667	0.011547	0.54±0.01	0.68	0.71	0.69	0.693333	0.0152753	0.69±0.02	0.84	0.86	0.85	0.85	0.01	0.85±0.01	5.47	5.74	5.56	5.59	0.137477	5.59±0.14	44.38	43.37	44.55	44.1	0.637887	44.1±0.64	2.96586	2.96366	2.96554	2.96502	0.0011859	2.97±0	0.1959	0.491225	0.225125	0.304083	0.162727	0.3±0.16
M3	0-5cm	0.04	0.01	0.01	0.02	0.0173205	0.02±0.02	0.33	0.34	0.34	0.336667	0.0057735	0.34±0.01	0.55	0.58	0.57	0.566667	0.0152753	0.57±0.02	0.51	0.54	0.52	0.523333	0.0152753	0.52±0.02	3.27	3.42	3.31	3.33333	0.0776745	3.33±0.08	45.87	46.4	48.35	46.8733	1.306	46.87±1.31	2.97841	2.97779	2.9792	2.97847	0.000704587	2.98±0	0.171775	0.228675	0.1959	0.198783	0.0285594	0.2±0.03
	5-10cm	0.2	0.24	0.2	0.213333	0.023094	0.21±0.02	1.03	1.07	1.04	1.04667	0.0208167	1.05±0.02	0.73	0.76	0.75	0.746667	0.0152753	0.75±0.02	0.56	0.58	0.56	0.566667	0.011547	0.57±0.01	3.65	3.79	3.7	3.71333	0.070946	3.71±0.07	44.18	45.78	46.61	45.5233	1.23517	45.52±1.24	2.97019	2.97002	2.9713	2.9705	0.000692139	2.97±0	0.195275	0.19245	0.277975	0.2219	0.0485829	0.22±0.05
	10-20cm	0.19	0.17	0.17	0.176667	0.011547	0.18±0.01	1.01	0.97	0.99	0.99	0.02	0.99±0.02	0.78	0.81	0.79	0.793333	0.0152753	0.79±0.02	0.41	0.43	0.42	0.42	0.01	0.42±0.01	3.85	4	3.89	3.91333	0.0776745	3.91±0.08	44.62	45.48	45.51	45.2033	0.505404	45.2±0.51	2.97041	2.97038	2.97087	2.97055	0.000271418	2.97±0	0.2726	0.285275	0.26775	0.275208	0.00904898	0.28±0.01
	20-40cm	0.09	0.12	0.09	0.1	0.0173205	0.1±0.02	0.96	1.01	0.98	0.983333	0.0251661	0.98±0.03	0.88	0.92	0.9	0.9	0.02	0.9±0.02	0.61	0.64	0.63	0.626667	0.0152753	0.63±0.02	3.52	3.65	3.56	3.57667	0.0665833	3.58±0.07	45.91	44.83	45.9	45.5467	0.620672	45.55±0.62	2.97128	2.96936	2.97079	2.97048	0.00099544	2.97±0	0.191925	0.26785	0.26	0.239925	0.0417541	0.24±0.04
CK	0-5cm	0.25	0.23	0.23	0.236667	0.011547	0.24±0.01	1.03	1.07	1.03	1.04333	0.023094	1.04±0.02	0.73	0.76	0.75	0.746667	0.0152753	0.75±0.02	0.55	0.58	0.56	0.563333	0.0152753	0.56±0.02	3.61	3.78	3.71	3.7	0.08544	3.7±0.09	45.35	44.39	45.69	45.1433	0.674191	45.14±0.67	2.97094	2.96922	2.97067	2.97028	0.000926669	2.97±0	0.27635	0.26535	0.27955	0.27375	0.00744849	0.27±0.01
	5-10cm	0.16	0.18	0.16	0.166667	0.011547	0.17±0.01	0.89	0.93	0.91	0.91	0.02	0.91±0.02	0.53	0.55	0.54	0.54	0.01	0.54±0.01	0.41	0.43	0.42	0.42	0.01	0.42±0.01	4.15	4.31	4.19	4.21667	0.0832666	4.22±0.08	45.46	44.58	47.51	45.85	1.50343	45.85±1.5	2.97212	2.97049	2.97289	2.97183	0.00122647	2.97±0	0.206125	0.280225	0.2604	0.248917	0.0383615	0.25±0.04
	10-20cm	0.03	0.01	0	0.0133333	0.0152753	0.01±0.02	0.41	0.43	0.42	0.42	0.01	0.42±0.01	0.46	0.48	0.47	0.47	0.01	0.47±0.01	0.63	0.65	0.64	0.64	0.01	0.64±0.01	4.57	4.73	4.66	4.65333	0.0802081	4.65±0.08	45.01	44.79	46.75	45.5167	1.07375	45.52±1.07	2.97264	2.97164	2.9732	2.97249	0.00078948	2.97±0	0.15585	0.258825	0.204925	0.206533	0.0515063	0.21±0.05
	20-40cm	0.01	0.03	0	0.0133333	0.0152753	0.01±0.02	0.33	0.34	0.34	0.336667	0.0057735	0.34±0.01	0.55	0.58	0.57	0.566667	0.0152753	0.57±0.02	0.51	0.53	0.52	0.52	0.01	0.52±0.01	3.27	3.42	3.32	3.33667	0.0763763	3.34±0.08	46.24	46.36	48.64	47.08	1.35233	47.08±1.35	2.97868	2.97776	2.97931	2.97859	0.000780912	2.98±0	0.97623	0.1525	0.1952	0.44131	0.463746	0.44±0.46
2024		(＞5mm)						(5-2mm)						(2-1mm)						(1-0.5mm)						(0.5-0.25mm)						0.25						D						MWD
M1	0-5cm	0.03	0.01	0.03	0.0233333	0.011547	0.02±0.01	0.55	0.57	0.55	0.556667	0.011547	0.56±0.01	0.62	0.63	0.61	0.62	0.01	0.62±0.01	0.71	0.72	0.7	0.71	0.01	0.71±0.01	5.14	5.05	5.23	5.14	0.09	5.14±0.09	44.07	43.48	45.07	44.2067	0.803762	44.21±0.8	2.96775	2.96752	2.9682	2.96782	0.000347908	2.97±0	0.220975	0.217675	0.2237	0.220783	0.00301707	0.22±0
	5-10cm	0.34	0.34	0.36	0.346667	0.011547	0.35±0.01	0.74	0.73	0.75	0.74	0.01	0.74±0.01	0.51	0.5	0.52	0.51	0.01	0.51±0.01	0.4	0.39	0.41	0.4	0.01	0.4±0.01	4.5	4.41	4.59	4.5	0.09	4.5±0.09	43.93	43.91	45.53	44.4567	0.929588	44.46±0.93	2.97031	2.97081	2.97072	2.97061	0.000266302	2.97±0	0.267675	0.2658	0.2765	0.269992	0.00571382	0.27±0.01
	10-20cm	0.01	0.03	0.01	0.0166667	0.011547	0.02±0.01	0.48	0.49	0.47	0.48	0.01	0.48±0.01	0.57	0.56	0.58	0.57	0.01	0.57±0.01	0.66	0.67	0.65	0.66	0.01	0.66±0.01	6.01	5.89	6.13	6.01	0.12	6.01±0.12	42.59	42.58	44.14	43.1033	0.897794	43.1±0.9	2.96452	2.96484	2.96527	2.96488	0.000380343	2.96±0	0.21365	0.216275	0.217875	0.215933	0.00213312	0.22±0
	20-40cm	0.11	0.13	0.11	0.116667	0.011547	0.12±0.01	0.98	0.96	1	0.98	0.02	0.98±0.02	0.84	0.83	0.85	0.84	0.01	0.84±0.01	0.6	0.59	0.61	0.6	0.01	0.6±0.01	3.27	3.21	3.34	3.27333	0.0650641	3.27±0.07	44.61	44.61	46.23	45.15	0.935307	45.15±0.94	2.97154	2.97193	2.972	2.97183	0.000246729	2.97±0	0.25535	0.25605	0.261775	0.257725	0.00352482	0.26±0
M2	0-5cm	1.39	1.39	1.43	1.40333	0.023094	1.4±0.02	0.99	0.97	1.01	0.99	0.02	0.99±0.02	0.76	0.75	0.77	0.76	0.01	0.76±0.01	0.81	0.8	0.82	0.81	0.01	0.81±0.01	6.34	6.22	6.46	6.34	0.12	6.34±0.12	39.98	39.98	41.44	40.4667	0.842931	40.47±0.84	2.95112	2.9518	2.95186	2.95159	0.000411542	2.95±0	0.46025	0.4575	0.47265	0.463467	0.00807099	0.46±0.01
	5-10cm	0	0.04	0.02	0.02	0.02	0.02±0.02	0.8	0.79	0.81	0.8	0.01	0.8±0.01	0.78	0.77	0.79	0.78	0.01	0.78±0.01	0.65	0.66	0.64	0.65	0.01	0.65±0.01	5.85	5.73	5.97	5.85	0.12	5.85±0.12	42.28	42.28	43.84	42.8	0.900666	42.8±0.9	2.96184	2.96221	2.96252	2.96219	0.000340621	2.96±0	0.238725	0.242975	0.247375	0.243025	0.00432522	0.24±0
	10-20cm	1.31	1.31	1.35	1.32333	0.023094	1.32±0.02	1.48	1.46	1.5	1.48	0.02	1.48±0.02	0.68	0.67	0.69	0.68	0.01	0.68±0.01	0.61	0.6	0.62	0.61	0.01	0.61±0.01	3.64	3.57	3.71	3.64	0.07	3.64±0.07	42.62	42.62	44.18	43.14	0.900666	43.14±0.9	2.96272	2.96321	2.96332	2.96309	0.000319726	2.96±0	0.4635	0.461125	0.475775	0.4668	0.00786277	0.47±0.01
	20-40cm	0.01	0.01	0.03	0.0166667	0.011547	0.02±0.01	0.51	0.5	0.52	0.51	0.01	0.51±0.01	0.66	0.65	0.67	0.66	0.01	0.66±0.01	0.81	0.8	0.82	0.81	0.01	0.81±0.01	5.36	5.25	5.47	5.36	0.11	5.36±0.11	43.18	43.18	44.77	43.71	0.917987	43.71±0.92	2.9658	2.96638	2.96629	2.96615	0.000312873	2.97±0	0.2173	0.242975	0.22625	0.228842	0.0130322	0.23±0.01
M3	0-5cm	0.01	0.04	0.01	0.02	0.0173205	0.02±0.02	0.32	0.31	0.33	0.32	0.01	0.32±0.01	0.54	0.53	0.55	0.54	0.01	0.54±0.01	0.5	0.49	0.51	0.5	0.01	0.5±0.01	3.19	3.13	3.26	3.19333	0.0650641	3.19±0.07	46.08	46.08	47.75	46.6367	0.964175	46.64±0.96	2.97908	2.97938	2.97936	2.97927	0.000164538	2.98±0	0.186725	0.461125	0.192575	0.280142	0.156763	0.28±0.16
	5-10cm	0.19	0.19	0.23	0.203333	0.023094	0.2±0.02	1	0.98	1.02	1	0.02	1±0.02	0.72	0.71	0.73	0.72	0.01	0.72±0.01	0.54	0.53	0.55	0.54	0.01	0.54±0.01	3.54	3.47	3.61	3.54	0.07	3.54±0.07	44.52	44.52	46.14	45.06	0.935307	45.06±0.94	2.97119	2.97168	2.97153	2.97147	0.000251051	2.97±0	0.26605	0.215325	0.278475	0.253283	0.0334548	0.25±0.03
	10-20cm	0.16	0.18	0.16	0.166667	0.011547	0.17±0.01	0.94	0.96	0.92	0.94	0.02	0.94±0.02	0.76	0.75	0.77	0.76	0.01	0.76±0.01	0.4	0.39	0.41	0.4	0.01	0.4±0.01	3.73	3.66	3.81	3.73333	0.0750555	3.73±0.08	44.42	44.42	46.04	44.96	0.935307	44.96±0.94	2.97141	2.9716	2.97205	2.97169	0.000332302	2.97±0	0.257625	0.189625	0.261325	0.236192	0.0403703	0.24±0.04
	20-40cm	0.09	0.09	0.11	0.0966667	0.011547	0.1±0.01	0.94	0.92	0.96	0.94	0.02	0.94±0.02	0.86	0.85	0.88	0.863333	0.0152753	0.86±0.02	0.6	0.59	0.61	0.6	0.01	0.6±0.01	3.41	3.34	3.48	3.41	0.07	3.41±0.07	44.64	44.64	46.27	45.1833	0.941081	45.18±0.94	2.97121	2.9717	2.97156	2.97149	0.000252042	2.97±0	0.251275	0.263675	0.261025	0.258658	0.00652999	0.26±0.01
CK	0-5cm	0.22	0.24	0.22	0.226667	0.011547	0.23±0.01	1	0.98	1.02	1	0.02	1±0.02	0.72	0.71	0.73	0.72	0.01	0.72±0.01	0.54	0.53	0.55	0.54	0.01	0.54±0.01	3.54	3.47	3.61	3.54	0.07	3.54±0.07	44.52	44.52	46.14	45.06	0.935307	45.06±0.94	2.97109	2.97151	2.97156	2.97138	0.000260321	2.97±0	0.27055	0.26105	0.276975	0.269525	0.00801183	0.27±0.01
	5-10cm	0.15	0.15	0.17	0.156667	0.011547	0.16±0.01	0.87	0.85	0.89	0.87	0.02	0.87±0.02	0.51	0.5	0.52	0.51	0.01	0.51±0.01	0.4	0.39	0.41	0.4	0.01	0.4±0.01	4.04	3.96	4.12	4.04	0.08	4.04±0.08	44.63	44.63	46.24	45.1667	0.929534	45.17±0.93	2.97237	2.9729	2.9727	2.97266	0.000266361	2.97±0	0.269375	0.2489	0.25605	0.258108	0.0103915	0.26±0.01
	10-20cm	0	0.03	0.01	0.0133333	0.0152753	0.01±0.02	0.4	0.39	0.41	0.4	0.01	0.4±0.01	0.45	0.44	0.46	0.45	0.01	0.45±0.01	0.62	0.61	0.63	0.62	0.01	0.62±0.01	4.44	4.35	4.53	4.44	0.09	4.44±0.09	44.71	44.71	46.34	45.2533	0.941081	45.25±0.94	2.97323	2.97363	2.97358	2.97348	0.000221303	2.97±0	0.20005	0.271175	0.203275	0.224833	0.0401654	0.22±0.04
	20-40cm	0	0.01	0.03	0.0133333	0.0152753	0.01±0.02	0.32	0.31	0.33	0.32	0.01	0.32±0.01	0.54	0.53	0.55	0.54	0.01	0.54±0.01	0.5	0.49	0.51	0.5	0.01	0.5±0.01	3.19	3.13	3.26	3.19333	0.0650641	3.19±0.07	46.08	46.08	47.75	46.6367	0.964175	46.64±0.96	2.97912	2.97948	2.97929	2.9793	0.000181743	2.98±0	0.185225	0.1542	0.195575	0.178333	0.0215312	0.18±0.02
2023		BD						FC						Ks						TSP						CP						NCP						CEC
M1	0-5cm	1.43	1.41	1.44	1.42667	0.0152753	1.43±0.02	15.62	15.96	15.13	15.57	0.417253	15.57±0.42	48.79	49.69	50.6	49.6933	0.905005	49.69±0.91	46.0377	46.7925	45.6604	46.1635	0.576425	46.16±0.58	22.3366	22.5036	21.7872	22.2091	0.374824	22.21±0.37	23.7011	24.2889	23.8732	23.9544	0.302158	23.95±0.3	12.54	12.18	11.81	12.1767	0.365011	12.18±0.37
	5-10cm	1.43	1.39	1.44	1.42	0.0264575	1.42±0.03	14.05	14.77	14.53	14.45	0.366606	14.45±0.37	47.29	47.56	47.83	47.56	0.27	47.56±0.27	46.0377	47.5472	45.6604	46.4151	0.998397	46.42±1	20.0915	20.5303	20.9232	20.515	0.416061	20.52±0.42	25.9462	27.0169	24.7372	25.9001	1.14055	25.9±1.14	11.01	10.69	10.37	10.69	0.32	10.69±0.32
	10-20cm	1.37	1.35	1.4	1.37333	0.0251661	1.37±0.03	14.33	14.81	14.36	14.5	0.268887	14.5±0.27	45.52	46.31	47.1	46.31	0.79	46.31±0.79	48.3019	49.0566	47.1698	48.1761	0.949665	48.18±0.95	19.6321	19.9935	20.104	19.9099	0.246816	19.91±0.25	28.6698	29.0631	27.0658	28.2662	1.05803	28.27±1.06	11.31	10.98	10.65	10.98	0.33	10.98±0.33
	20-40cm	1.36	1.31	1.36	1.34333	0.0288675	1.34±0.03	14.88	14.71	14.3	14.63	0.298161	14.63±0.3	36.37	36.93	37.48	36.9267	0.555008	36.93±0.56	48.6792	50.566	48.6792	49.3082	1.08934	49.31±1.09	20.2368	19.2701	19.448	19.6516	0.514516	19.65±0.51	28.4424	31.2959	29.2312	29.6565	1.47352	29.66±1.47	9.68	9.4	9.12	9.4	0.28	9.4±0.28
M2	0-5cm	1.41	1.44	1.45	1.43333	0.0208167	1.43±0.02	15.18	15.34	15.44	15.32	0.131149	15.32±0.13	46.4	47.05	47.7	47.05	0.65	47.05±0.65	46.7925	45.6604	45.283	45.9119	0.785534	45.91±0.79	21.4038	22.0896	22.388	21.9605	0.504647	21.96±0.5	25.3887	23.5708	22.895	23.9515	1.28967	23.95±1.29	13.65	13.25	12.85	13.25	0.4	13.25±0.4
	5-10cm	1.43	1.44	1.47	1.44667	0.0208167	1.45±0.02	14	14.13	14.62	14.25	0.326956	14.25±0.33	38.49	39.42	40.35	39.42	0.93	39.42±0.93	46.0377	45.6604	44.5283	45.4088	0.785534	45.41±0.79	20.02	20.3472	21.4914	20.6195	0.772579	20.62±0.77	26.0177	25.3132	23.0369	24.7893	1.55795	24.79±1.56	13.37	12.98	12.59	12.98	0.39	12.98±0.39
	10-20cm	1.35	1.33	1.33	1.33667	0.011547	1.34±0.01	14.17	14.63	14.4	14.4	0.23	14.4±0.23	39.49	40.18	40.87	40.18	0.69	40.18±0.69	49.0566	49.8113	49.8113	49.5597	0.435736	49.56±0.44	19.1295	19.4579	19.152	19.2465	0.183452	19.25±0.18	29.9271	30.3534	30.6593	30.3133	0.367755	30.31±0.37	13.4	13.01	12.62	13.01	0.39	13.01±0.39
	20-40cm	1.37	1.39	1.39	1.38333	0.011547	1.38±0.01	13.89	13.98	13.98	13.95	0.0519615	13.95±0.05	34.01	34.81	35.6	34.8067	0.795005	34.81±0.8	48.3019	47.5472	47.5472	47.7987	0.435736	47.8±0.44	19.0293	19.4322	19.4322	19.2979	0.232614	19.3±0.23	29.2726	28.115	28.115	28.5008	0.66835	28.5±0.67	10.88	10.56	10.24	10.56	0.32	10.56±0.32
M3	0-5cm	1.43	1.44	1.47	1.44667	0.0208167	1.45±0.02	14.4	14.42	14.44	14.42	0.02	14.42±0.02	46.04	46.92	47.8	46.92	0.88	46.92±0.88	46.0377	45.6604	44.5283	45.4088	0.785534	45.41±0.79	20.592	20.7648	21.2268	20.8612	0.328196	20.86±0.33	25.4457	24.8956	23.3015	24.5476	1.11366	24.55±1.11	11.48	11.15	10.82	11.15	0.33	11.15±0.33
	5-10cm	1.43	1.42	1.42	1.42333	0.0057735	1.42±0.01	14.64	14.38	14.9	14.64	0.26	14.64±0.26	41.51	42.8	44.09	42.8	1.29	42.8±1.29	46.0377	46.4151	46.4151	46.2893	0.217868	46.29±0.22	20.9352	20.4196	21.158	20.8376	0.378752	20.84±0.38	25.1025	25.9955	25.2571	25.4517	0.477231	25.45±0.48	10.66	10.35	10.04	10.35	0.31	10.35±0.31
	10-20cm	1.37	1.33	1.31	1.33667	0.0305505	1.34±0.03	14.86	14.9	14.79	14.85	0.0556776	14.85±0.06	38.55	39.56	40.57	39.56	1.01	39.56±1.01	48.3019	49.8113	50.566	49.5597	1.15285	49.56±1.15	20.3582	19.817	19.3749	19.85	0.492482	19.85±0.49	27.9437	29.9943	31.1911	29.7097	1.64233	29.71±1.64	9.76	9.48	9.19	9.47667	0.285015	9.48±0.29
	20-40cm	1.33	1.33	1.33	1.33	0	1.33±0	16.12	15.7	16.23	16.0167	0.279702	16.02±0.28	33.15	33.93	34.7	33.9267	0.775005	33.93±0.78	49.8113	49.8113	49.8113	49.8113	0	49.81±0	21.4396	20.881	21.5859	21.3022	0.372004	21.3±0.37	28.3717	28.9303	28.2254	28.5092	0.372004	28.51±0.37	9.68	9.4	9.12	9.4	0.28	9.4±0.28
CK	0-5cm	1.35	1.35	1.37	1.35667	0.011547	1.36±0.01	13.54	13.64	13.03	13.4033	0.327159	13.4±0.33	48.48	49.31	50.14	49.31	0.83	49.31±0.83	49.0566	49.0566	48.3019	48.805	0.435736	48.81±0.44	18.279	18.414	17.8511	18.1814	0.293876	18.18±0.29	30.7776	30.6426	30.4508	30.6237	0.16423	30.62±0.16	9.05	8.79	8.52	8.78667	0.265016	8.79±0.27
	5-10cm	1.39	1.31	1.36	1.35333	0.0404145	1.35±0.04	13.71	13.48	12.86	13.35	0.439659	13.35±0.44	44.83	45.79	46.75	45.79	0.96	45.79±0.96	47.5472	50.566	48.6792	48.9308	1.52508	48.93±1.53	19.0569	17.6588	17.4896	18.0684	0.860207	18.07±0.86	28.4903	32.9072	31.1896	30.8624	2.2266	30.86±2.23	8.76	8.5	8.25	8.50333	0.255016	8.5±0.26
	10-20cm	1.4	1.45	1.41	1.42	0.0264575	1.42±0.03	13.17	13.83	13.94	13.6467	0.416453	13.65±0.42	43.42	45.06	46.7	45.06	1.64	45.06±1.64	47.1698	45.283	46.7925	46.4151	0.998397	46.42±1	18.438	20.0535	19.6554	19.3823	0.841664	19.38±0.84	28.7318	25.2295	27.1371	27.0328	1.75347	27.03±1.75	8.62	8.37	8.12	8.37	0.25	8.37±0.25
	20-40cm	1.39	1.36	1.3	1.35	0.0458258	1.35±0.05	14.89	14.25	14.73	14.6233	0.333067	14.62±0.33	34.38	35.56	36.74	35.56	1.18	35.56±1.18	47.5472	48.6792	50.9434	49.0566	1.72927	49.06±1.73	20.6971	19.38	19.149	19.742	0.835137	19.74±0.84	26.8501	29.2992	31.7944	29.3146	2.4722	29.31±2.47	9.39	9.12	8.85	9.12	0.27	9.12±0.27
2024		BD						FC						Ks						TSP						CP						NCP						CEC
M1	0-5cm	1.32	1.35	1.31	1.32667	0.0208167	1.33±0.02	13.99	14.05	14.06	14.0333	0.0378594	14.03±0.04	59.62	57.6	57.02	58.08	1.36484	58.08±1.36	50.1887	49.0566	50.566	49.9371	0.785534	49.94±0.79	18.4668	18.9675	18.4186	18.6176	0.30395	18.62±0.3	31.7219	30.0891	32.1474	31.3195	1.08657	31.32±1.09	12.73	12.46	12.22	12.47	0.255147	12.47±0.26
	5-10cm	1.33	1.36	1.39	1.36	0.03	1.36±0.03	14.5	14.85	15.2	14.85	0.35	14.85±0.35	47.12	49.63	52.14	49.63	2.51	49.63±2.51	49.8113	48.6792	47.5472	48.6792	1.13208	48.68±1.13	19.285	20.196	21.128	20.203	0.92152	20.2±0.92	30.5263	28.4832	26.4192	28.4762	2.05358	28.48±2.05	11.16	10.83	10.7	10.8967	0.237136	10.9±0.24
	10-20cm	1.28	1.36	1.44	1.36	0.08	1.36±0.08	13.9	14.44	15	14.4467	0.55003	14.45±0.55	39.85	42.3	44.75	42.3	2.45	42.3±2.45	51.6981	48.6792	45.6604	48.6792	3.01887	48.68±3.02	17.792	19.6384	21.6	19.6768	1.90429	19.68±1.9	33.9061	29.0408	24.0604	29.0024	4.92298	29±4.92	11.48	11.23	10.98	11.23	0.25	11.23±0.25
	20-40cm	1.33	1.38	1.43	1.38	0.05	1.38±0.05	14.8	15.05	15.3	15.05	0.25	15.05±0.25	33.58	36.1	38.62	36.1	2.52	36.1±2.52	49.8113	47.9245	46.0377	47.9245	1.88679	47.92±1.89	19.684	20.769	21.879	20.7773	1.09752	20.78±1.1	30.1273	27.1555	24.1587	27.1472	2.9843	27.15±2.98	9.85	9.59	9.35	9.59667	0.250067	9.6±0.25
M2	0-5cm	1.22	1.27	1.32	1.27	0.05	1.27±0.05	14.8	14.42	16	15.0733	0.824702	15.07±0.82	64.65	69.57	74.49	69.57	4.92	69.57±4.92	53.9623	52.0755	50.1887	52.0755	1.88679	52.08±1.89	18.056	18.3134	21.12	19.1631	1.69958	19.16±1.7	35.9063	33.7621	29.0687	32.9123	3.4971	32.91±3.5	13.93	13.57	13.23	13.5767	0.350048	13.58±0.35
	5-10cm	1.24	1.31	1.38	1.31	0.07	1.31±0.07	15.8	14.84	16.8	15.8133	0.980068	15.81±0.98	61.04	65.32	69.6	65.32	4.28	65.32±4.28	53.2075	50.566	47.9245	50.566	2.64151	50.57±2.64	19.592	19.4404	23.184	20.7388	2.11896	20.74±2.12	33.6155	31.1256	24.7405	29.8272	4.57776	29.83±4.58	13.67	13.34	12.94	13.3167	0.365559	13.32±0.37
	10-20cm	1.25	1.32	1.39	1.32	0.07	1.32±0.07	14.8	14.63	15.3	14.91	0.348281	14.91±0.35	49.3	53.01	56.72	53.01	3.71	53.01±3.71	52.8302	50.1887	47.5472	50.1887	2.64151	50.19±2.64	18.5	19.3116	21.267	19.6929	1.42236	19.69±1.42	34.3302	30.8771	26.2802	30.4958	4.03853	30.5±4.04	13.7	13.23	12.94	13.29	0.383536	13.29±0.38
	20-40cm	1.27	1.33	1.39	1.33	0.06	1.33±0.06	13.8	14.97	14.9	14.5567	0.656227	14.56±0.66	44.9	47.21	49.52	47.21	2.31	47.21±2.31	52.0755	49.8113	47.5472	49.8113	2.26415	49.81±2.26	17.526	19.9101	20.711	19.3824	1.65678	19.38±1.66	34.5495	29.9012	26.8362	30.429	3.88364	30.43±3.88	11.12	10.88	10.51	10.8367	0.3073	10.84±0.31
M3	0-5cm	1.33	1.38	1.43	1.38	0.05	1.38±0.05	14.3	15.55	15.1	14.9833	0.633114	14.98±0.63	41.3	44.09	46.88	44.09	2.79	44.09±2.79	49.8113	47.9245	46.0377	47.9245	1.88679	47.92±1.89	19.019	21.459	21.593	20.6903	1.44897	20.69±1.45	30.7923	26.4655	24.4447	27.2342	3.24285	27.23±3.24	11.73	11.39	11.14	11.42	0.296142	11.42±0.3
	5-10cm	1.32	1.39	1.46	1.39	0.07	1.39±0.07	14.2	14.76	15	14.6533	0.410528	14.65±0.41	37.33	40.57	43.81	40.57	3.24	40.57±3.24	50.1887	47.5472	44.9057	47.5472	2.64151	47.55±2.64	18.744	20.5164	21.9	20.3868	1.58199	20.39±1.58	31.4447	27.0308	23.0057	27.1604	4.221	27.16±4.22	10.9	10.58	10.33	10.6033	0.285715	10.6±0.29
	10-20cm	1.33	1.41	1.49	1.41	0.08	1.41±0.08	14.8	14.71	15.4	14.97	0.3751	14.97±0.38	32.28	34.7	37.12	34.7	2.42	34.7±2.42	49.8113	46.7925	43.7736	46.7925	3.01887	46.79±3.02	19.684	20.7411	22.946	21.1237	1.66432	21.12±1.66	30.1273	26.0514	20.8276	25.6688	4.66166	25.67±4.66	9.95	9.67	9.42	9.68	0.265141	9.68±0.27
	20-40cm	1.28	1.36	1.44	1.36	0.08	1.36±0.08	12.9	15.09	13.6	13.8633	1.1185	13.86±1.12	48.47	52.12	55.77	52.12	3.65	52.12±3.65	51.6981	48.6792	45.6604	48.6792	3.01887	48.68±3.02	16.512	20.5224	19.584	18.8728	2.09766	18.87±2.1	35.1861	28.1568	26.0764	29.8064	4.77365	29.81±4.77	9.9	9.62	9.38	9.63333	0.260256	9.63±0.26
CK	0-5cm	1.34	1.42	1.5	1.42	0.08	1.42±0.08	12.5	13.95	13	13.15	0.736546	13.15±0.74	39.44	41.98	44.52	41.98	2.54	41.98±2.54	49.434	46.4151	43.3962	46.4151	3.01887	46.42±3.02	16.75	19.809	19.5	18.6863	1.68402	18.69±1.68	32.684	26.6061	23.8962	27.7288	4.50015	27.73±4.5	9.24	8.98	8.72	8.98	0.26	8.98±0.26
	5-10cm	1.31	1.39	1.47	1.39	0.08	1.39±0.08	12.2	13.54	13	12.9133	0.674191	12.91±0.67	37.06	39.85	42.64	39.85	2.79	39.85±2.79	50.566	47.5472	44.5283	47.5472	3.01887	47.55±3.02	15.982	18.8206	19.11	17.9709	1.72848	17.97±1.73	34.584	28.7266	25.4183	29.5763	4.64157	29.58±4.64	8.93	8.66	8.46	8.68333	0.235867	8.68±0.24
	10-20cm	1.35	1.43	1.51	1.43	0.08	1.43±0.08	11.9	13.62	12.6	12.7067	0.864947	12.71±0.86	36	38.54	41.08	38.54	2.54	38.54±2.54	49.0566	46.0377	43.0189	46.0377	3.01887	46.04±3.02	16.065	19.4766	19.026	18.1892	1.85336	18.19±1.85	32.9916	26.5611	23.9929	27.8485	4.63545	27.85±4.64	8.79	8.57	8.34	8.56667	0.225019	8.57±0.23
	20-40cm	1.41	1.42	1.44	1.42333	0.0152753	1.42±0.02	13.01	13.65	13.67	13.4433	0.375411	13.44±0.38	35.99	36.74	36.87	36.5333	0.475009	36.53±0.48	46.7925	46.4151	45.6604	46.2893	0.576425	46.29±0.58	18.3441	19.383	19.6848	19.1373	0.70331	19.14±0.7	28.4484	27.0321	25.9756	27.152	1.24074	27.15±1.24	9.61	9.31	9.05	9.32333	0.280238	9.32±0.28
2023		SOM						TN						TP						TK						AN						AP						AK						pH
M1	0-5cm	10.11	10.49	9.88	10.16	0.308058	10.16±0.31	0.439	0.418	0.463	0.44	0.0225167	0.44±0.02	0.732	0.698	0.73	0.72	0.0190788	0.72±0.02	17.78	18.17	17.94	17.9633	0.196044	17.96±0.2	58.94	57.33	56.83	57.7	1.10259	57.7±1.1	6.91	7.22	6.87	7	0.191572	7±0.19	47.1	48.7	45.95	47.25	1.38112	47.25±1.38	8.12	8.43	8.11	8.22	0.181934	8.22±0.18
	5-10cm	8.33	8.76	8.59	8.56	0.216564	8.56±0.22	0.405	0.441	0.414	0.42	0.018735	0.42±0.02	0.676	0.655	0.709	0.68	0.0272213	0.68±0.03	17.46	17.88	17.79	17.71	0.221133	17.71±0.22	42.33	44.38	43.07	43.26	1.03812	43.26±1.04	6.37	6.5	6.33	6.4	0.0888819	6.4±0.09	41.91	42.31	40.75	41.6567	0.810267	41.66±0.81	8.23	8.26	7.9	8.13	0.19975	8.13±0.2
	10-20cm	7.79	8.14	8.01	7.98	0.176918	7.98±0.18	0.312	0.341	0.277	0.31	0.0320468	0.31±0.03	0.724	0.686	0.75	0.72	0.032187	0.72±0.03	17.91	17.6	17.77	17.76	0.155242	17.76±0.16	16.25	17.42	16.82	16.83	0.585064	16.83±0.59	5.7	5.94	5.76	5.8	0.1249	5.8±0.12	40.57	41.23	41.29	41.03	0.3995	41.03±0.4	8.24	8.09	8.08	8.13667	0.0896289	8.14±0.09
	20-40cm	4.12	4.21	3.7	4.01	0.272213	4.01±0.27	0.212	0.249	0.199	0.22	0.0259422	0.22±0.03	0.577	0.598	0.565	0.58	0.0167033	0.58±0.02	17.48	17.61	17.53	17.54	0.0655744	17.54±0.07	12.77	11.66	12.26	12.23	0.555608	12.23±0.56	5.43	6.14	6.13	5.9	0.407063	5.9±0.41	41.42	42.14	41.13	41.5633	0.520032	41.56±0.52	8.09	8.31	8.08	8.16	0.13	8.16±0.13
M2	0-5cm	13.29	13.03	13.4	13.24	0.19	13.24±0.19	0.656	0.623	0.671	0.65	0.0245561	0.65±0.02	0.482	0.493	0.525	0.5	0.0223383	0.5±0.02	17.62	17.91	17.66	17.73	0.157162	17.73±0.16	42.95	44.8	43.65	43.8	0.934077	43.8±0.93	8.55	8.09	8.06	8.23333	0.274651	8.23±0.27	88.91	87.76	88	88.2233	0.606658	88.22±0.61	8.14	8.07	8.09	8.1	0.0360555	8.1±0.04
	5-10cm	11.76	11.41	11.77	11.6467	0.20502	11.65±0.21	0.528	0.548	0.553	0.543	0.0132288	0.54±0.01	0.407	0.435	0.418	0.42	0.0141067	0.42±0.01	17.88	18.21	18.08	18.0567	0.166233	18.06±0.17	39.21	40.35	39.54	39.7	0.5866	39.7±0.59	7.28	7.22	7.6	7.36667	0.204287	7.37±0.2	68.49	69.86	69.05	69.1333	0.688791	69.13±0.69	8.09	7.62	7.93	7.88	0.238956	7.88±0.24
	10-20cm	11.83	11.56	11.95	11.78	0.19975	11.78±0.2	0.418	0.412	0.415	0.415	0.003	0.42±0	0.337	0.316	0.337	0.33	0.0121244	0.33±0.01	18.19	18.71	18.42	18.44	0.260576	18.44±0.26	20.03	21.42	20.69	20.7133	0.695294	20.71±0.7	7.83	7.14	7.74	7.57	0.3751	7.57±0.38	41.86	42.5	41.92	42.0933	0.353459	42.09±0.35	8.07	8.2	8.24	8.17	0.0888819	8.17±0.09
	20-40cm	10.74	10.94	10.99	10.89	0.132288	10.89±0.13	0.406	0.418	0.407	0.410333	0.00665833	0.41±0.01	0.272	0.299	0.269	0.28	0.0165227	0.28±0.02	17.94	17.48	17.89	17.77	0.252389	17.77±0.25	17.55	15.68	17.18	16.8033	0.990269	16.8±0.99	5.75	6.18	6.37	6.1	0.317648	6.1±0.32	41.92	41.22	41.54	41.56	0.350428	41.56±0.35	8.03	8.17	8.23	8.14333	0.102632	8.14±0.1
M3	0-5cm	9.87	10.94	9.53	10.1133	0.735822	10.11±0.74	0.604	0.633	0.608	0.615	0.0157162	0.62±0.02	0.526	0.514	0.52	0.52	0.006	0.52±0.01	18.12	17.84	18.56	18.1733	0.362951	18.17±0.36	46.56	48.91	48.08	47.85	1.19176	47.85±1.19	7.76	7.24	7	7.33333	0.388501	7.33±0.39	102.46	104.72	102.19	103.123	1.38933	103.12±1.39	8.25	8.19	7.97	8.13667	0.147422	8.14±0.15
	5-10cm	11.5	11.15	10.6	11.0833	0.453689	11.08±0.45	0.551	0.531	0.553	0.545	0.0121655	0.55±0.01	0.633	0.616	0.641	0.63	0.0127671	0.63±0.01	18.19	18.53	18.42	18.38	0.173494	18.38±0.17	41.28	43.62	41.56	42.1533	1.27786	42.15±1.28	6.88	6.13	6.99	6.66667	0.46801	6.67±0.47	101.78	103.55	100.97	102.1	1.31943	102.1±1.32	8.17	8.32	7.87	8.12	0.229129	8.12±0.23
	10-20cm	13.78	14.47	14.7	14.3167	0.478783	14.32±0.48	0.462	0.487	0.461	0.47	0.0147309	0.47±0.01	0.562	0.593	0.555	0.57	0.0202237	0.57±0.02	17.81	18.11	17.93	17.95	0.150997	17.95±0.15	42.75	44.15	42.88	43.26	0.773499	43.26±0.77	5.43	5.61	5.96	5.66667	0.269506	5.67±0.27	65.49	66.5	65.03	65.6733	0.751953	65.67±0.75	8.1	8.06	7.91	8.02333	0.100167	8.02±0.1
	20-40cm	12.07	13.46	13.25	12.9267	0.749289	12.93±0.75	0.431	0.397	0.432	0.42	0.0199249	0.42±0.02	0.587	0.553	0.6	0.58	0.0242693	0.58±0.02	17.45	17.82	17.53	17.6	0.194679	17.6±0.19	18.83	20.49	19.73	19.6833	0.830983	19.68±0.83	5.6	5.8	5.7	5.7	0.1	5.7±0.1	57.83	58.71	59.26	58.6	0.721318	58.6±0.72	8.08	8.01	7.91	8	0.08544	8±0.09
CK	0-5cm	9.09	9.01	9.26	9.12	0.127671	9.12±0.13	0.418	0.449	0.419	0.428667	0.0176163	0.43±0.02	0.742	0.711	0.767	0.74	0.0280535	0.74±0.03	18.32	18.58	18.54	18.48	0.14	18.48±0.14	20.54	22.28	20.96	21.26	0.907965	21.26±0.91	10.22	11.01	10.57	10.6	0.395854	10.6±0.4	96.23	98.89	97.56	97.56	1.33	97.56±1.33	8.23	8.73	8.97	8.64333	0.377536	8.64±0.38
	5-10cm	9.02	9.1	8.91	9.01	0.0953939	9.01±0.1	0.384	0.379	0.407	0.39	0.0149332	0.39±0.01	0.621	0.606	0.633	0.62	0.0135277	0.62±0.01	18.34	17.92	18.34	18.2	0.242487	18.2±0.24	16.98	15.94	16.64	16.52	0.530283	16.52±0.53	7.74	8.21	8.05	8	0.238956	8±0.24	83.49	85.1	84.15	84.2467	0.809341	84.25±0.81	8.11	8.68	8.2	8.33	0.306431	8.33±0.31
	10-20cm	7.5	7.46	7.81	7.59	0.191572	7.59±0.19	0.408	0.421	0.401	0.41	0.0101489	0.41±0.01	0.686	0.707	0.707	0.7	0.0121244	0.7±0.01	17.85	18.12	17.76	17.91	0.18735	17.91±0.19	14.21	15.49	14.25	14.65	0.727736	14.65±0.73	7.38	6.87	7.05	7.1	0.25865	7.1±0.26	70.55	69.33	69.79	69.89	0.616117	69.89±0.62	8.4	8.13	8.43	8.32	0.165227	8.32±0.17
	20-40cm	4.52	4.76	4.67	4.65	0.121244	4.65±0.12	0.313	0.336	0.311	0.32	0.0138924	0.32±0.01	0.712	0.685	0.723	0.706667	0.0195533	0.71±0.02	17.63	17.83	17.73	17.73	0.1	17.73±0.1	13.88	12.2	13.67	13.25	0.915369	13.25±0.92	6.15	6.4	6.35	6.3	0.132288	6.3±0.13	59.25	59.19	60.72	59.72	0.866545	59.72±0.87	8.11	8.09	8.31	8.17	0.121655	8.17±0.12
2024		SOM						TN						TP						TK						AN						AP						AK						pH
M1	0-5cm	10.35	10.65	10.95	10.65	0.3	10.65±0.3	0.49	0.5	0.51	0.5	0.01	0.5±0.01	0.52	0.53	0.54	0.53	0.01	0.53±0.01	17.5979	17.32	16.9396	17.2858	0.330477	17.29±0.33	11.2896	11.55	11.3755	11.405	0.132688	11.41±0.13	7.2305	7.033	6.9773	7.08027	0.133053	7.08±0.13	52.06	53.95	55.84	53.95	1.89	53.95±1.89	8.25	7.97	7.69	7.97	0.28	7.97±0.28
	5-10cm	7.86	8.19	8.52	8.19	0.33	8.19±0.33	0.6	0.62	0.64	0.62	0.02	0.62±0.02	0.6	0.62	0.64	0.62	0.02	0.62±0.02	16.4663	17.04	16.7952	16.7672	0.287876	16.77±0.29	8.3036	8.1	7.9605	8.12137	0.172545	8.12±0.17	10.6405	10.43	10.222	10.4308	0.209251	10.43±0.21	48.98	50.75	52.52	50.75	1.77	50.75±1.77	8.15	7.87	7.59	7.87	0.28	7.87±0.28
	10-20cm	8.65	9.01	9.37	9.01	0.36	9.01±0.36	0.39	0.41	0.43	0.41	0.02	0.41±0.02	0.5	0.51	0.52	0.51	0.01	0.51±0.01	15.7493	16.25	16.6558	16.2184	0.454077	16.22±0.45	7.6226	7.7	7.4442	7.58893	0.131181	7.59±0.13	11.8882	11.76	11.865	11.8377	0.0683112	11.84±0.07	51.42	53.29	55.16	53.29	1.87	53.29±1.87	8.19	7.91	7.63	7.91	0.28	7.91±0.28
	20-40cm	5.48	5.7	5.92	5.7	0.22	5.7±0.22	0.45	0.47	0.49	0.47	0.02	0.47±0.02	0.66	0.68	0.7	0.68	0.02	0.68±0.02	16.2233	16.02	16.3702	16.2045	0.175855	16.2±0.18	6.4628	6.6	6.3935	6.48543	0.105094	6.49±0.11	11.063	11.13	11.1258	11.1063	0.0375288	11.11±0.04	47.4	49.13	50.86	49.13	1.73	49.13±1.73	8.19	7.91	7.63	7.91	0.28	7.91±0.28
M2	0-5cm	12.86	13.4	13.94	13.4	0.54	13.4±0.54	0.6	0.63	0.66	0.63	0.03	0.63±0.03	0.61	0.63	0.65	0.63	0.02	0.63±0.02	17.619	18.17	18.0646	17.9512	0.292481	17.95±0.29	7.4446	7.35	7.3555	7.38337	0.0531009	7.38±0.05	8.1239	8.06	8.1176	8.1005	0.0352152	8.1±0.04	40.66	42.1339	43.6	42.1313	1.47	42.13±1.47	8.37	8.09	7.81	8.09	0.28	8.09±0.28
	5-10cm	11.3	11.77	12.24	11.77	0.47	11.77±0.47	0.54	0.56	0.58	0.56	0.02	0.56±0.02	0.46	0.48	0.5	0.48	0.02	0.48±0.02	18.5375	18.11	18.3303	18.3259	0.213783	18.33±0.21	10.4875	10.15	9.8937	10.1771	0.297824	10.18±0.3	10.6873	10.6	10.656	10.6478	0.0442285	10.65±0.04	41.26	42.7543	44.24	42.7514	1.49	42.75±1.49	8.21	7.93	7.65	7.93	0.28	7.93±0.28
	10-20cm	11.47	11.95	12.43	11.95	0.48	11.95±0.48	0.44	0.46	0.48	0.46	0.02	0.46±0.02	0.42	0.43	0.44	0.43	0.01	0.43±0.01	17.6497	17.63	17.6634	17.6477	0.0167896	17.65±0.02	9.169	9.45	9.7497	9.45623	0.2904	9.46±0.29	9.4359	9.74	9.9339	9.70327	0.251024	9.7±0.25	40.88	42.3486	43.82	42.3495	1.47	42.35±1.47	8.63	8.34	8.05	8.34	0.29	8.34±0.29
	20-40cm	10.55	10.99	11.43	10.99	0.44	10.99±0.44	0.34	0.35	0.36	0.35	0.01	0.35±0.01	0.52	0.53	0.54	0.53	0.01	0.53±0.01	15.3342	15.12	15.3091	15.2544	0.117097	15.25±0.12	9.7812	9.45	9.5535	9.5949	0.169437	9.59±0.17	8.6227	8.37	8.4108	8.46783	0.135661	8.47±0.14	43.82	45.4007	46.98	45.4002	1.58	45.4±1.58	8.41	8.13	7.85	8.13	0.28	8.13±0.28
M3	0-5cm	12.03	12.53	13.03	12.53	0.5	12.53±0.5	0.56	0.58	0.6	0.58	0.02	0.58±0.02	0.45	0.47	0.49	0.47	0.02	0.47±0.02	15.448	15.9	16.053	15.8003	0.314573	15.8±0.31	9.7776	10.09	10.2442	10.0373	0.237728	10.04±0.24	8.7485	8.47	8.1903	8.4696	0.2791	8.47±0.28	85.1	88.2147	91.32	88.2116	3.11	88.21±3.11	8.61	8.32	8.03	8.32	0.29	8.32±0.29
	5-10cm	11.14	11.6	12.06	11.6	0.46	11.6±0.46	0.5	0.52	0.54	0.52	0.02	0.52±0.02	0.42	0.44	0.46	0.44	0.02	0.44±0.02	16.1603	15.65	15.5154	15.7752	0.340201	15.78±0.34	8.8083	9.1	9.378	9.09543	0.284877	9.1±0.28	8.1737	7.99	8.2127	8.12547	0.118927	8.13±0.12	66.71	69.1314	71.55	69.1305	2.42	69.13±2.42	8.19	7.91	7.63	7.91	0.28	7.91±0.28
	10-20cm	14.12	14.7	15.28	14.7	0.58	14.7±0.58	0.42	0.44	0.46	0.44	0.02	0.44±0.02	0.47	0.49	0.51	0.49	0.02	0.49±0.02	15.933	15.68	15.5289	15.714	0.20418	15.71±0.2	8.555	8.4	8.4474	8.46747	0.0794245	8.47±0.08	5.9537	5.96	5.882	5.9319	0.0433293	5.93±0.04	40.63	42.0954	43.57	42.0985	1.47	42.1±1.47	8.47	8.18	7.89	8.18	0.29	8.18±0.29
	20-40cm	12.72	13.25	13.78	13.25	0.53	13.25±0.53	0.41	0.43	0.45	0.43	0.02	0.43±0.02	0.36	0.37	0.38	0.37	0.01	0.37±0.01	15.7917	15.78	16.1783	15.9167	0.226657	15.92±0.23	5.7686	5.9	5.9933	5.8873	0.112887	5.89±0.11	5.6232	5.7	5.7196	5.68093	0.0509499	5.68±0.05	40.11	41.5644	43.01	41.5615	1.45	41.56±1.45	8.47	8.18	7.89	8.18	0.29	8.18±0.29
CK	0-5cm	8.89	9.26	9.63	9.26	0.37	9.26±0.37	0.39	0.41	0.43	0.41	0.02	0.41±0.02	0.72	0.75	0.78	0.75	0.03	0.75±0.03	14.8414	15.32	15.265	15.1421	0.261891	15.14±0.26	12.7241	12.95	13.3489	13.0077	0.316367	13.01±0.32	10.3419	10.57	10.9301	10.614	0.296558	10.61±0.3	76.26	79.0088	81.76	79.0096	2.75	79.01±2.75	8.76	8.47	8.17	8.46667	0.295014	8.47±0.3
	5-10cm	7.6	7.91	8.22	7.91	0.31	7.91±0.31	0.37	0.39	0.41	0.39	0.02	0.39±0.02	0.63	0.65	0.67	0.65	0.02	0.65±0.02	16.6293	16.35	16.0135	16.3309	0.308342	16.33±0.31	11.3663	11.1	11.3286	11.265	0.144104	11.26±0.14	11.427	11.05	10.8692	11.1154	0.284593	11.12±0.28	57.54	59.6211	61.7	59.6204	2.08	59.62±2.08	8.49	8.2	7.91	8.2	0.29	8.2±0.29
	10-20cm	7.5	7.81	8.12	7.81	0.31	7.81±0.31	0.4	0.42	0.44	0.42	0.02	0.42±0.02	0.67	0.69	0.71	0.69	0.02	0.69±0.02	15.4565	15.85	16.2188	15.8418	0.381217	15.84±0.38	10.7384	10.45	10.797	10.6618	0.18575	10.66±0.19	11.1565	11.05	11.4052	11.2039	0.182282	11.2±0.18	55.46	57.4905	59.52	57.4902	2.03	57.49±2.03	8.72	8.43	8.14	8.43	0.29	8.43±0.29
	20-40cm	3.52	3.67	3.82	3.67	0.15	3.67±0.15	0.34	0.35	0.36	0.35	0.01	0.35±0.01	0.76	0.79	0.82	0.79	0.03	0.79±0.03	14.8323	14.85	15.3477	15.01	0.292591	15.01±0.29	10.5273	10.5	10.1673	10.3982	0.200431	10.4±0.2	10.3934	10.35	10.118	10.2871	0.148072	10.29±0.15	61.58	63.799	66.02	63.7997	2.22	63.8±2.22	8.6	8.31	8.02	8.31	0.29	8.31±0.29
2023		β-Glu						URE						ALP						CBH
M1	0-5cm	55.36	54.45	60.02	56.61	2.98799	56.61±2.99	20.42	19.71	21.13	20.42	0.71	20.42±0.71	65.23	64.3	66.16	65.23	0.93	65.23±0.93	6.21	6	6.42	6.21	0.21	6.21±0.21
	5-10cm	53.36	51.76	54.96	53.36	1.6	53.36±1.6	19.32	18.65	19.99	19.32	0.67	19.32±0.67	64.44	62.93	65.94	64.4367	1.505	64.44±1.51	6.06	5.88	6.23	6.05667	0.175024	6.06±0.18
	10-20cm	50.84	49.31	52.37	50.84	1.53	50.84±1.53	18.11	17.6	18.62	18.11	0.51	18.11±0.51	63.98	62.54	65.42	63.98	1.44	63.98±1.44	5.57	5.4	5.74	5.57	0.17	5.57±0.17
	20-40cm	45.27	43.91	46.63	45.27	1.36	45.27±1.36	16.21	15.83	16.59	16.21	0.38	16.21±0.38	62.38	61.13	63.63	62.38	1.25	62.38±1.25	4.37	4.24	4.5	4.37	0.13	4.37±0.13
M2	0-5cm	57.93	56.19	59.67	57.93	1.74	57.93±1.74	21.41	20.97	21.85	21.41	0.44	21.41±0.44	68.47	66.85	70.09	68.47	1.62	68.47±1.62	6.23	6.02	6.44	6.23	0.21	6.23±0.21
	5-10cm	55.21	53.55	56.87	55.21	1.66	55.21±1.66	20.09	19.49	20.69	20.09	0.6	20.09±0.6	69.42	67.99	70.85	69.42	1.43	69.42±1.43	6.11	5.92	6.3	6.11	0.19	6.11±0.19
	10-20cm	53.41	51.81	58.01	54.41	3.2187	54.41±3.22	19.42	18.75	20.09	19.42	0.67	19.42±0.67	68.54	67.08	70	68.54	1.46	68.54±1.46	6.02	5.84	6.2	6.02	0.18	6.02±0.18
	20-40cm	51.89	50.33	53.45	51.89	1.56	51.89±1.56	18.01	17.46	18.56	18.01	0.55	18.01±0.55	66.39	65.06	67.72	66.39	1.33	66.39±1.33	5.69	5.51	5.87	5.69	0.18	5.69±0.18
M3	0-5cm	60.32	58.51	62.13	60.32	1.81	60.32±1.81	21.32	20.84	21.8	21.32	0.48	21.32±0.48	68.79	67.22	70.36	68.79	1.57	68.79±1.57	6.33	6.12	6.55	6.33333	0.215019	6.33±0.22
	5-10cm	55.95	54.27	57.63	55.95	1.68	55.95±1.68	20.11	19.48	20.74	20.11	0.63	20.11±0.63	68.42	66.85	69.99	68.42	1.57	68.42±1.57	6.19	6.01	6.37	6.19	0.18	6.19±0.18
	10-20cm	55.21	53.55	56.87	55.21	1.66	55.21±1.66	19.98	19.37	20.59	19.98	0.61	19.98±0.61	67.33	65.97	68.69	67.33	1.36	67.33±1.36	6.01	5.83	6.19	6.01	0.18	6.01±0.18
	20-40cm	53.49	51.89	55.09	53.49	1.6	53.49±1.6	17.42	16.86	17.98	17.42	0.56	17.42±0.56	67.01	65.67	68.35	67.01	1.34	67.01±1.34	4.99	4.84	5.14	4.99	0.15	4.99±0.15
CK	0-5cm	27.38	26.56	28.2	27.38	0.82	27.38±0.82	20.31	19.68	20.94	20.31	0.63	20.31±0.63	32.23	31.51	32.95	32.23	0.72	32.23±0.72	5.15	4.99	5.31	5.15	0.16	5.15±0.16
	5-10cm	21.95	21.29	22.61	21.95	0.66	21.95±0.66	18.11	17.56	18.66	18.11	0.55	18.11±0.55	27.89	27.1	28.68	27.89	0.79	27.89±0.79	4.23	4.11	4.35	4.23	0.12	4.23±0.12
	10-20cm	19.35	18.77	19.93	19.35	0.58	19.35±0.58	16.21	15.76	16.66	16.21	0.45	16.21±0.45	24.32	23.6	25.04	24.32	0.72	24.32±0.72	2.96	2.87	3.05	2.96	0.09	2.96±0.09
	20-40cm	19.12	18.55	19.69	19.12	0.57	19.12±0.57	11.23	10.9	11.56	11.23	0.33	11.23±0.33	24.33	23.61	25.05	24.33	0.72	24.33±0.72	2.66	2.58	2.74	2.66	0.08	2.66±0.08
2024		β-Glu						URE						ALP						CBH
M1	0-5cm	57.65	55.92	61.58	58.3833	2.90039	58.38±2.9	19.35	18.88	20.98	19.7367	1.1021	19.74±1.1	62.56	63.45	65.16	63.7233	1.32138	63.72±1.32	5.9	6.1	6.35	6.11667	0.225462	6.12±0.23
	5-10cm	54.71	52.04	56.09	54.28	2.05896	54.28±2.06	18.92	18.45	19.78	19.05	0.674463	19.05±0.67	62.3	63.12	65.65	63.69	1.74622	63.69±1.75	5.8	5.95	6.15	5.96667	0.175594	5.97±0.18
	10-20cm	51.59	48.97	53.01	51.19	2.04949	51.19±2.05	17.98	17.5	18.45	17.9767	0.475009	17.98±0.48	62.1	63	64.85	63.3167	1.40208	63.32±1.4	5.3	5.55	5.7	5.51667	0.202073	5.52±0.2
	20-40cm	46.19	43.78	48.06	46.01	2.14567	46.01±2.15	15.9	15.65	16.4	15.9833	0.381881	15.98±0.38	61.1	62.2	63.1	62.1333	1.00167	62.13±1	4.25	4.35	4.45	4.35	0.1	4.35±0.1
M2	0-5cm	60.06	57.72	61.88	59.8867	2.08541	59.89±2.09	21.02	20.9	21.6	21.1733	0.374344	21.17±0.37	66.85	67.95	68.92	67.9067	1.03568	67.91±1.04	6.05	6.15	6.38	6.19333	0.169214	6.19±0.17
	5-10cm	56.86	54.31	58.68	56.6167	2.19514	56.62±2.2	19.82	19.35	20.61	19.9267	0.636736	19.93±0.64	68.5	67.8	70.2	68.8333	1.23423	68.83±1.23	5.95	6.05	6.25	6.08333	0.152753	6.08±0.15
	10-20cm	55.55	52.58	59.32	55.8167	3.3779	55.82±3.38	18.87	18.69	19.98	19.18	0.698642	19.18±0.7	66.8	67.45	69.85	68.0333	1.6065	68.03±1.61	5.85	5.9	6.15	5.96667	0.160728	5.97±0.16
	20-40cm	53.59	51.01	54.98	53.1933	2.01451	53.19±2.01	17.7	17.4	18.42	17.84	0.524214	17.84±0.52	65.9	64.8	67	65.9	1.1	65.9±1.1	5.55	5.6	5.85	5.66667	0.160728	5.67±0.16
M3	0-5cm	63.48	59.36	63.81	62.2167	2.47944	62.22±2.48	20.89	20.65	21.55	21.03	0.466047	21.03±0.47	67.9	67.5	69.8	68.4	1.22882	68.4±1.23	6.18	6.2	6.45	6.27667	0.150444	6.28±0.15
	5-10cm	57.82	54.78	58.58	57.06	2.01077	57.06±2.01	19.78	19.3	20.45	19.8433	0.57761	19.84±0.58	66.9	67.4	68.8	67.7	0.984886	67.7±0.98	6	6.1	6.3	6.13333	0.152753	6.13±0.15
	10-20cm	56.71	54.22	58.04	56.3233	1.93913	56.32±1.94	19.65	19.2	20.5	19.7833	0.660177	19.78±0.66	66	65.5	67.6	66.3667	1.09697	66.37±1.1	5.85	5.9	6.1	5.95	0.132288	5.95±0.13
	20-40cm	55.14	52.54	56.85	54.8433	2.17026	54.84±2.17	16.98	16.65	17.85	17.16	0.619919	17.16±0.62	65.8	65.2	67.5	66.1667	1.19304	66.17±1.19	4.85	4.9	5.05	4.93333	0.104083	4.93±0.1
CK	0-5cm	27.16	25.89	28.55	27.2	1.33045	27.2±1.33	19.8	19.5	20.6	19.9667	0.568624	19.97±0.57	31.48	31.2	32.5	31.7267	0.684203	31.73±0.68	5.05	5.1	5.25	5.13333	0.104083	5.13±0.1
	5-10cm	22.17	20.98	22.78	21.9767	0.915442	21.98±0.92	17.7	17.45	18.4	17.85	0.492443	17.85±0.49	26.95	27.3	28.4	27.55	0.756637	27.55±0.76	4.1	4.2	4.3	4.2	0.1	4.2±0.1
	10-20cm	19.1	17.9	19.98	18.9933	1.04409	18.99±1.04	15.85	15.55	16.5	15.9667	0.485627	15.97±0.49	23.85	24.2	24.9	24.3167	0.534634	24.32±0.53	2.85	2.9	3	2.91667	0.0763763	2.92±0.08
	20-40cm	18.96	17.45	19.29	18.5667	0.981037	18.57±0.98	10.95	10.7	11.45	11.0333	0.381881	11.03±0.38	23.8	23.7	24.9	24.1333	0.665833	24.13±0.67	2.55	2.6	2.7	2.61667	0.0763763	2.62±0.08
2023WATER	0-20	20-60	60-180
M1	11.7	8.3	6.3
M2	9.4	5.6	4.4
M3	9.1	5.9	4.3
CK	6.9	6.7	9.7
2024WATER	0-20	20-60	60-180
M1	13.4	11.3	8.4
M2	11.7	9.2	8.1
M3	9.2	9.8	6.9
CK	8.1	9.6	9.3
[truncated: 6 more columns]
